# Supplementary material for: Water quality implications of post-wildfire erosion control with polymeric additives
Source: Royal Society of Chemistry journal article supplement (doi:10.1039/d4em00334a), 2025-01-01
Supplement: d4em00334a1.pdf [file d4em00334a1.pdf]

## Water Quality Implications of Post-Wildfire Erosion Control with Polymeric Additives

### Supplementary Information

Alishan Ahmed<sup>1</sup>, Amanda K. Hohner<sup>2</sup>, Peter R. Robichaud<sup>3</sup>, and Idil Deniz Akin<sup>4\*</sup>

<sup>1</sup>Assistant Consultant, Geotechnical Engineering, WSP USA, Redmond, WA, USA:  
[alishan.ahmed@wsp.com](mailto:alishan.ahmed@wsp.com)

<sup>2</sup>Assistant Professor, Montana State University, Bozeman, MT, USA: [amanda.hohner@montana.edu](mailto:amanda.hohner@montana.edu)

<sup>3</sup>Research Engineer, US Department of Agriculture, Forest Service, Rocky Mountain Research Station,  
Moscow, ID, USA: [peter.robichaud@usda.gov](mailto:peter.robichaud@usda.gov)

<sup>4\*</sup>Corresponding author, Associate Professor, University of California Los Angeles, Los Angeles, CA, USA:  
[idilakin@g.ucla.edu](mailto:idilakin@g.ucla.edu)

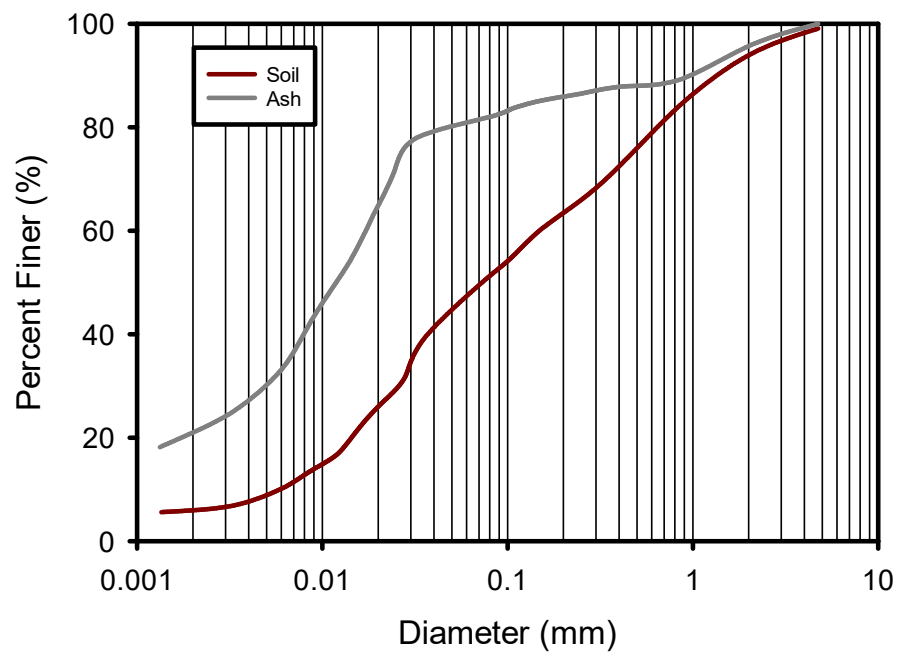

**SI Figure 1.** Particle size distribution curves of soil and ash sampled from the study site.
